# Supplementary material
Source: Springer Nature journal article supplement (https://www.springermedizin.de/resource/supplementary/12885_2008_1421_MOESM1_ESM.pdf/9473100)

**A**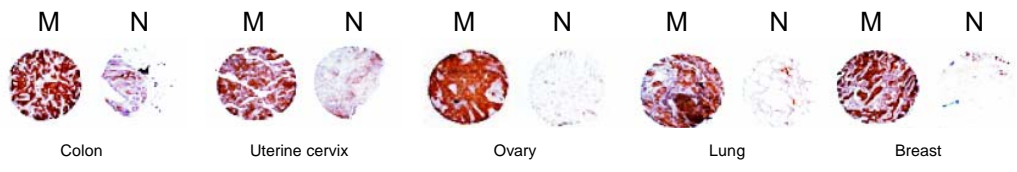

M: Malignant tissue, N: Normal tissue

**B**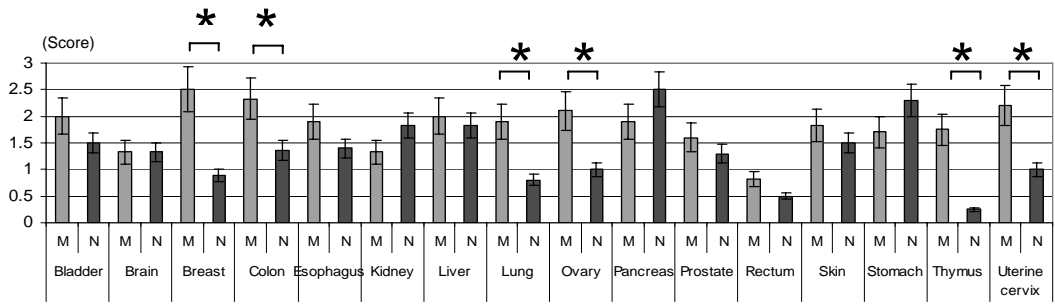

M: Malignant tissue, N: Normal tissue \* :  $p < 0.05$  (Two-Tail, Mann-Whitney U-Test)

**C**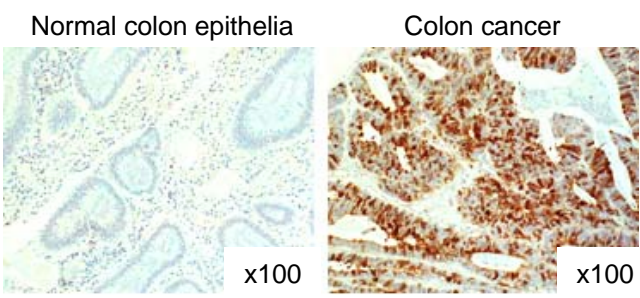**D**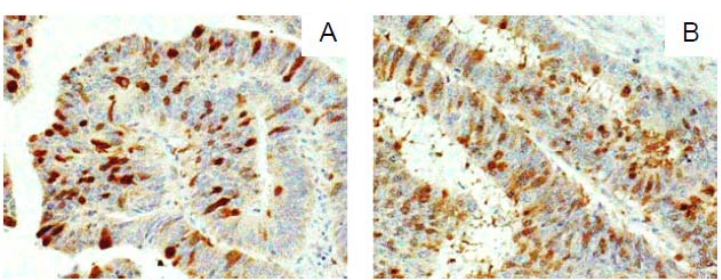

Supplement: MOESM1 [file 9473100]
